# Supplementary material for: Disruption of the HER3-PI3K-mTOR oncogenic signaling axis and PD-1 blockade as a multimodal precision immunotherapy in head and neck cancer
Source: PubMed Central journal article supplement (PMC8062674; doi:10.1038/s41467-021-22619-w), 2021-04-22
Supplement: 41467_2021_22619_MOESM2_ESM.pdf [file 41467_2021_22619_MOESM2_ESM.pdf]

## Descriptions of Additional Supplementary Files

### **Supplementary Data 1**

**Description:** siRNA library screen targeting human kinases in Cal27 cells was conducted to search for genes that affect proliferation of HNSCC cells. Shown are the Z-scores for viability when each gene was knocked down.
